# Supplementary material for: Lactic acid fermented microalgae and cyanobacteria as a new source of lipid reducing compounds: assessment through zebrafish Nile red fat metabolism assay and untargeted metabolomics
Source: Royal Society of Chemistry journal article supplement (doi:10.1039/d4fo00699b), 2024-01-01
Supplement: d4fo00699b1.xlsx [file d4fo00699b1.xlsx]

## Sheet: unique compounds
		Chlorella fermentations
		37 unique nodes in GNPS classical network in C5 sample (Chlorella 4339)
sample code	sample	m/z	RT [s]	RT [min]	putative identification	MQ score	shared peaks	level 5	superclass	smiles	species	ppm	source
CHLA 4339	C5	199.13	995.856	16.5976
CHLA 4339	C5	199.13	1030.46	17.1744
CHLA 4339	C5	215.978	256.964	4.28274
CHLA 4339	C5	217.107	230.999	3.84998
CHLA 4339	C5	229.155	50.4978	0.84163					alkaloids		bacterium / fungus	1.1	NPA
CHLA 4339	C5	239.162	474.981	7.91634
CHLA 4339	C5	242.065	146.54	2.44233	4-(1H-indol-3-yl-sulfanyl)phenol				alkaloids	OC1=CC=C(SC2=CNC3=CC=CC=C23)C=C1	bacterium	4.4	NPA
CHLA 4339	C5	249.149	367.241	6.12068	3-Hydroxy-4(15),10(14),11(13)-guaiatrien-12-oic_acid				diterpenoids				Dereplicator plus		singleton
CHLA 4339	C5	261.131	54.4736	0.907894
CHLA 4339	C5	262.166	219.367	3.65611					diterpenoids cluster
CHLA 4339	C5	263.15	251.293	4.18822					diterpenoids cluster
CHLA 4339	C5	292.227	288.143	4.80239
CHLA 4339	C5	295.165	65.7343	1.09557					alkaloids		bacterium	2.9	NPA
CHLA 4339	C5	317.209	558.504	9.3084	tenacibactin A				ornithine alkaloids	CC(C)CC(=O)N(CCCCCNC(=O)CCC(=O)OC)O	bacterium	4.3	NPA
CHLA 4339	C5	319.115	415.453	6.92422
CHLA 4339	C5	319.224	598.491	9.97485	1-Hydroxy-8(17),12,14-labdatrien-19-oic_acid				diterpenoids				Dereplicator plus		singleton
CHLA 4339	C5	329.014	46.001	0.766683	Spectral Match to Adenosine 2',3'-cyclic monophosphate from NIST14	0.706228	6			nan			GNPS
CHLA 4339	C5	349.235	610.07	10.1678
CHLA 4339	C5	377.146	209.807	3.49678	Spectral Match to (-)-Riboflavin from NIST14	0.813742	10	flavins	organoheterocyclic compounds	CC1=CC2=C(C=C1C)N(C3=NC(=O)NC(=O)C3=N2)C[C@@H]([C@@H]([C@@H](CO)O)O)O			GNPS
CHLA 4339	C5	401.258	233.988	3.89981	Phenazinomycin				alkaloids	C=C1CCCC(C)(C)C1CC/C(C)=C\CN1C2=CC=CC(=O)C2=NC2=CC=CC=C21	bacterium	3.4	NPA
CHLA 4339	C5	415.254	206.883	3.44805
CHLA 4339	C5	425.749	236.13	3.93551
CHLA 4339	C5	459.28	212.824	3.54706	GALANTHAMINE HYDROBROMIDE	0.711192	6		alkaloids	Br.COc1ccc2c3c1OC1CC(O)C=CC31CCN(C)C2			GNPS
CHLA 4339	C5	495.197	337.715	5.62858
CHLA 4339	C5	503.306	217.451	3.62418
CHLA 4339	C5	538.277	336.547	5.60911	1-Palmitoyl-sn-glycero-3-phosphocholine	0.795486	6			nan			GNPS
CHLA 4339	C5	547.332	221.241	3.68736
CHLA 4339	C5	791.483	865.842	14.4307	Spectral Match to 1,2-Dioleoyl-sn-glycero-3-phospho-rac-1-glycerol from NIST14	0.771361	7	phosphatidylglycerols	lipids and lipid-like	CCCCCCCC/C=C\\CCCCCCCC(=O)OC[C@H](COP(=O)(O)OCC(CO)O)OC(=O)CCCCCCC/C=C\\CCCCCCCC			GNPS
CHLA 4339	C5	814.571	895.298	14.9216	Pyropheophytin a	0.806579	7			nan			GNPS
CHLA 4339	C5	815.495	922.343	15.3724
CHLA 4339	C5	831.499	875.552	14.5925	Spectral Match to 1-(9Z-Octadecenoyl)-2-tetradecanoyl-sn-glycero-3-phosphocholine from NIST14	0.721845	7			nan
CHLA 4339	C5	837.477	922.51	15.3752
CHLA 4339	C5	1011.75	826.279	13.7713
CHLA 4339	C5	1017.09	793.695	13.2282
CHLA 4339	C5	1276.35	852.245	14.2041	[(2S,3R,4S,5S)-3-[(2S,3R,4R,5R,6S)-3,4-dihydroxy-6-methyl-5-[(2S,3R,4S,5S,6R)-3,4,5-trihydroxy-6-(hydroxymethyl)oxan-2-yl]oxyoxan-2-yl]oxy-4,5-dihydroxyoxan-2-yl] (4aR,5R,6aS,6bR,10S,12aR,14bS)-5-hydroxy-10-[(2R,3R,4S,5S,6R)-4-hydroxy-6-(hydroxymethyl)-3-[(2S,3R,4R,5R,6S)-3,4,5-trihydroxy-6-methyloxan-2-yl]oxy-5-[(2S,3R,4S,5R)-3,4,5-trihydroxyoxan-2-yl]oxyoxan-2-yl]oxy-2,2,6a,6b,9,9,12a-heptameth…	0.727226	12	triterpene saponins	lipids and lipid-like	C[C@@H]1O[C@@H](O[C@@H]2[C@@H](O)[C@H](O[C@@H]3OC[C@@H](O)[C@H](O)[C@H]3O)[C@@H](CO)O[C@H]2O[C@H]2CC[C@@]3(C)C(CC[C@]4(C)C3CC=C3[C@@H]5CC(C)(C)CC[C@]5(C(=O)O[C@@H]5OC[C@H](O)[C@H](O)[C@H]5O[C@@H]5O[C@@H](C)[C@H](O[C@@H]6O[C@H](CO)[C@@H](O)[C@H](O)[C@H]6O)[C@H](O)[C@H]5O)[C@H](O)C[C@]34C)C2(C)C)[C@H](O)[C@H](O)[C@H]1O
CHLA 4339	C5	1573.43	919.699	15.3283
CHLA 4339	C5	1742.14	831.123	13.8521
	shared peaks
													source
	16 shared mass peaks with other bioactive fermented extracts
sample code	sample	m/z	RT [s]	RT [min]	putative identification	MQ score	shared peaks	level 5	superclass	smiles		ppm	source
CHLA 4339 shared	C2.mzML|C5.mzML	189.069	87.5612	1.45935
with CHLA 1473		291.203	455.514	7.5919
		337.244	517.373	8.62288
		666.283	29.104	0.485067
CHLA 4339 shared	C2.mzML|C5.mzML|C7.mzML	188.071	51.8192	0.863653
with CHLA 1473
and CHLA 1932
CHLA 4339 shared	C4.mzML|C5.mzML|C7.mzML	661.244	377.456	6.29093
with CHLA 1932
and CHLA 2240
CHLA 4339 shared	C4.mzML|C5.mzML	199.13	1004.82	16.7469
with CHLA 2240		255.008	375.648	6.26081
		305.162	133.654	2.22757
		307.152	367.652	6.12753	4-amino-4,6-dideoxyglucose-alanopine				aminosugars and aminoglycosides	CC1C(C(C(C(O1)O)O)O)NC(=O)C(C)NC(C)C(=O)O	bacterium	4.8	NPA
		359.709	228.354	3.80589
		381.723	230.688	3.8448
		477.267	364.39	6.07316
		515.204	271.313	4.52189	UK-2A				macrolides	C[C@H]1[C@@H]([C@H](C(=O)OC[C@@H](C(=O)O1)NC(=O)C2=NC=CC(=C2O)OC)CC3=CC=CC=C3)OC(=O)C(C)C	bacterium	2.1	NPA
		525.288	211.169	3.51948
		569.276	484.961	8.08268	Microcyclamide MZ568				oligopeptides	CC[C@H](C)[C@H]1C2=NC(=CS2)C(=O)N[C@H](C(=O)N[C@H](C(=O)N[C@H](C(=O)N[C@H](C(=O)N1)[C@@H](C)O)C(C)C)[C@@H](C)O)C	bacterium (microcystis)	0.5	NPA

## Sheet: FBMN mass peaks
	Chlorella fermentations
	11 significant nodes in GNPS FBMN, for Chlorella fermented extracts (> 0.62 corr & p < 0.025)
	m/z	RT [s]	RT [min]	putative identification	MQ score	shared peaks	level 5	superclass	smiles	ppm	source	commentary
	220.083	2.2514	0.0375233
	229.155	0.7806	0.01301					alkaloids		0.6	NPA	3 different hits from fungus/bacterium
	253.143	8.7855	0.146425
	261.144	1.3414	0.0223567	Spectral Match to L-.gamma.-Glutamyl-L-glutamic Acid from NIST14	0.768555	6		amino acids and peptides	nan		GNPS
	262.167	3.6508	0.0608467					purine nucleotides cluster
	263.15	4.1622	0.06937					purine nucleotides cluster				cluster with 2'-3'-cyclic adenosine monophosphates!
	305.157	1.2808	0.0213467
	361.162	8.7748	0.146247
	388.254	3.32	0.0553333									nonaethylenglycol cluster = contamination.
	393.21	3.3207	0.055345
	791.482	14.5948	0.243247	Spectral Match to 1,2-Dipalmitoyl-sn-glycero-3-phospho-(1'-rac-glycerol) from NIST14	0.722988	7		phosphatidylglycerols	CCCCCCCCCCCCCCCC(=O)OC[C@H](COP(=O)(O)OCC(CO)O)OC(=O)CCCCCCCCCCCCCCC		GNPS
	831.499	14.8437	0.247395	PC(16:0/16:1); [M+H]+ C40H79N1O8P1	0.73155	7		phosphatidylcholin	nan		GNPS
